# Supplementary figures and images for: Gastroprotective effects of polysaccharides from purple sweet potato (Ipomoea batatas (L.) Lam) on an ethanol-induced gastric ulcer via regulating immunity and activating the PI3K/Akt/Rheb/mTOR pathway
Source: Royal Society of Chemistry journal article supplement (doi:10.1039/d4fo01071j), 2024-01-01

PI3K

127 kDa

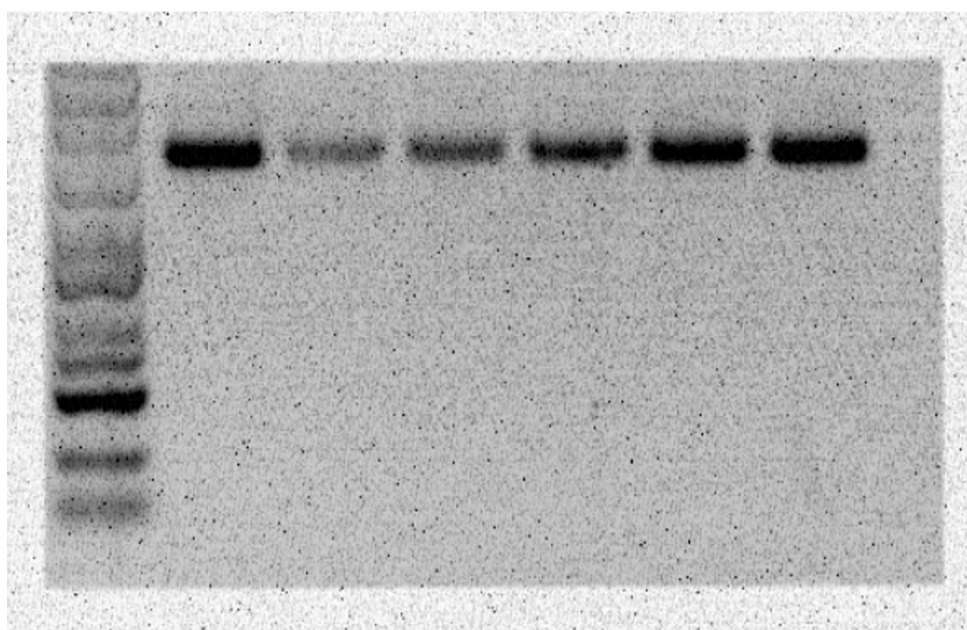

P-AKT

56 kDa

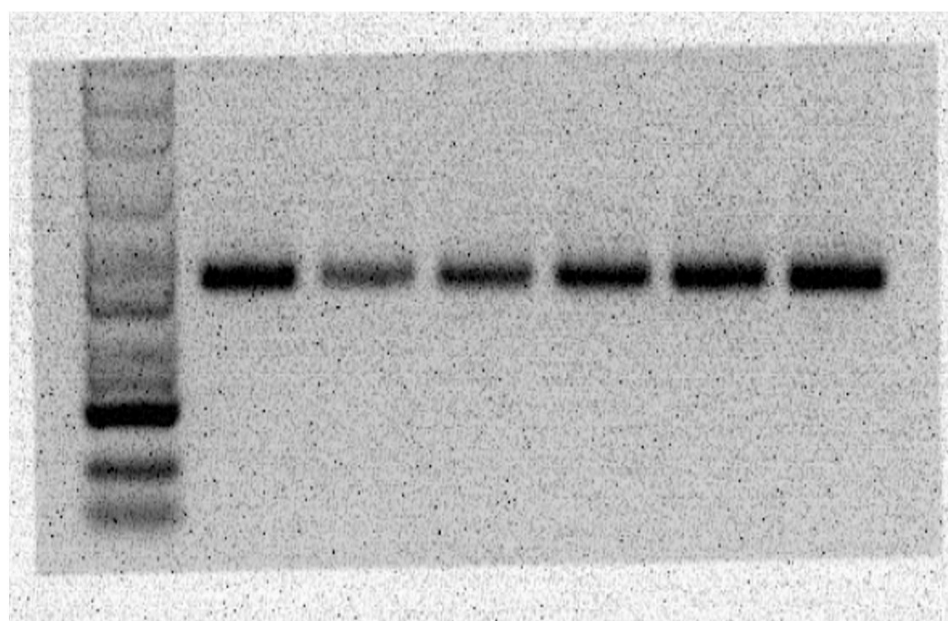

AKT

56 kDa

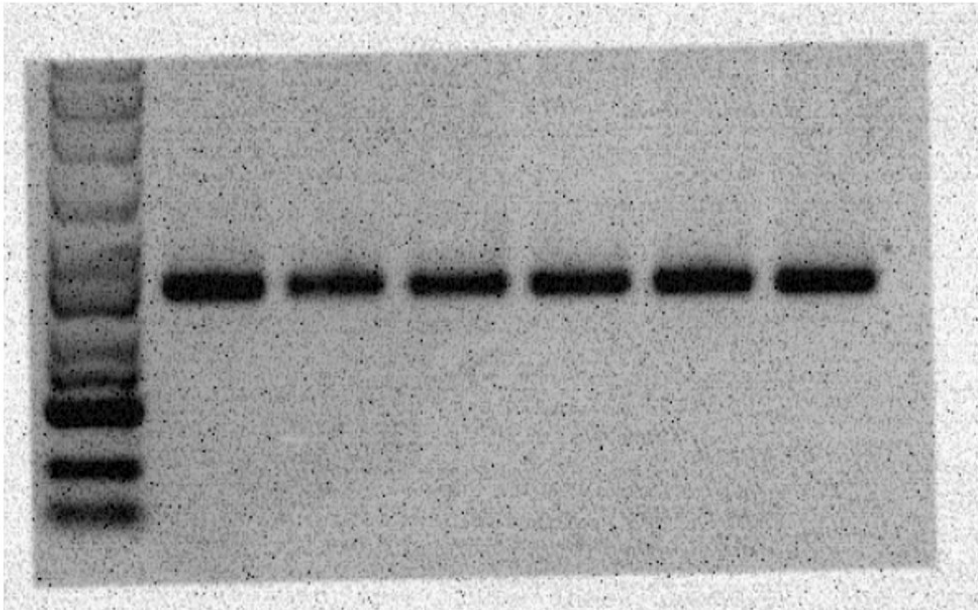

Rheb

20 kDa

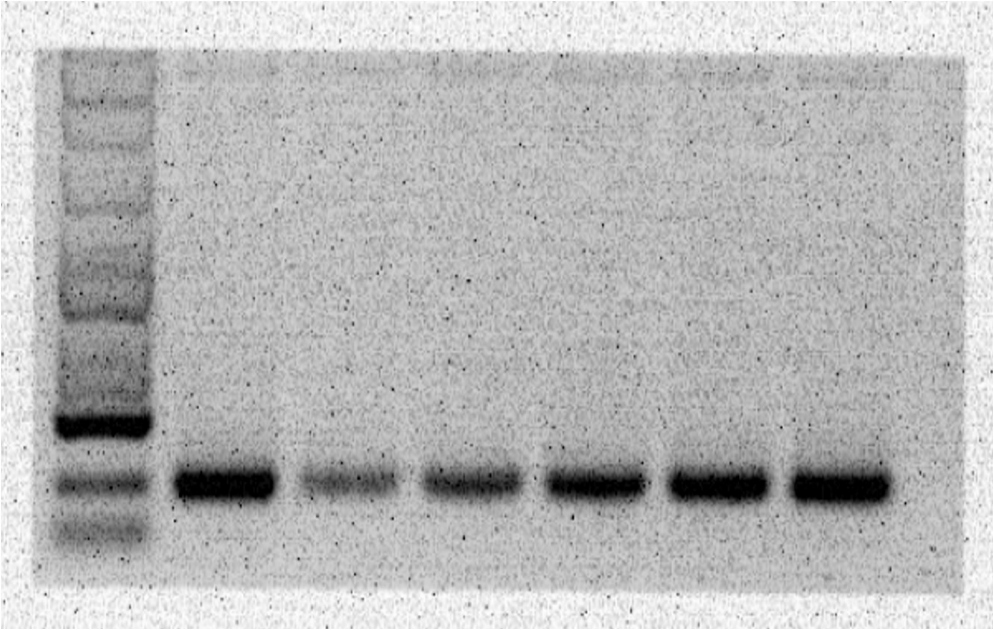

mTOR

289 kDa

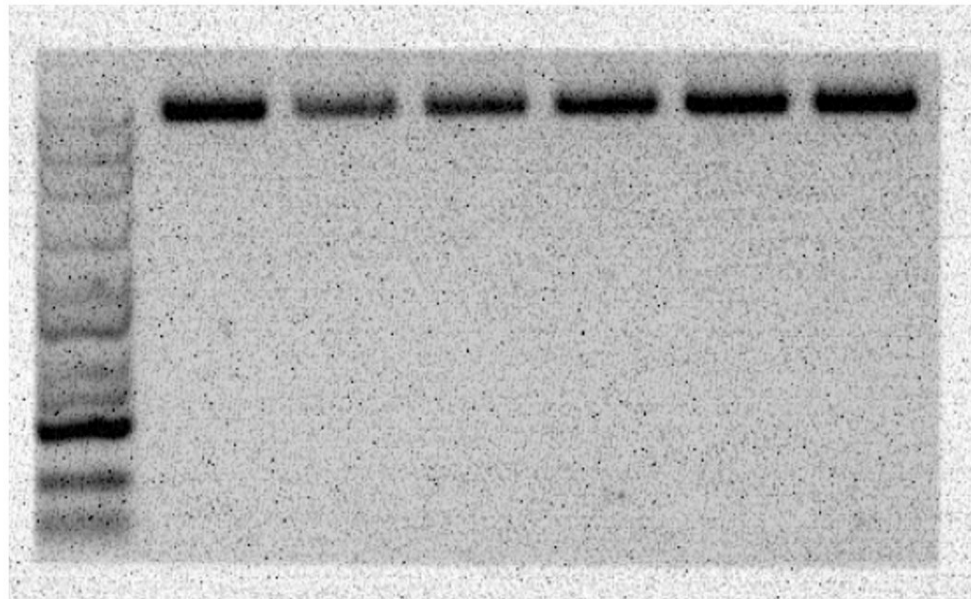

GAPDH

36 kDa

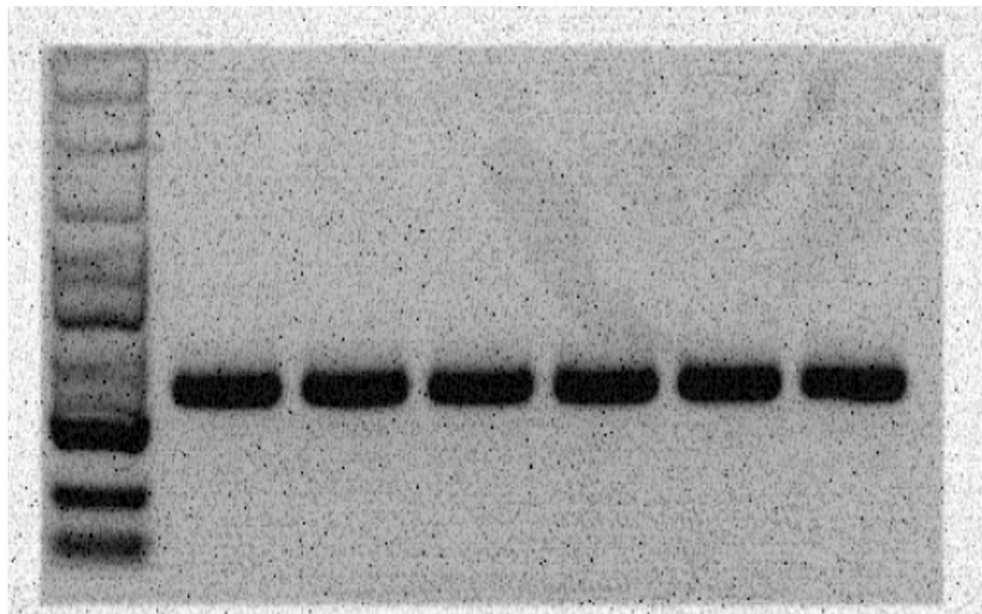

MUC5AC

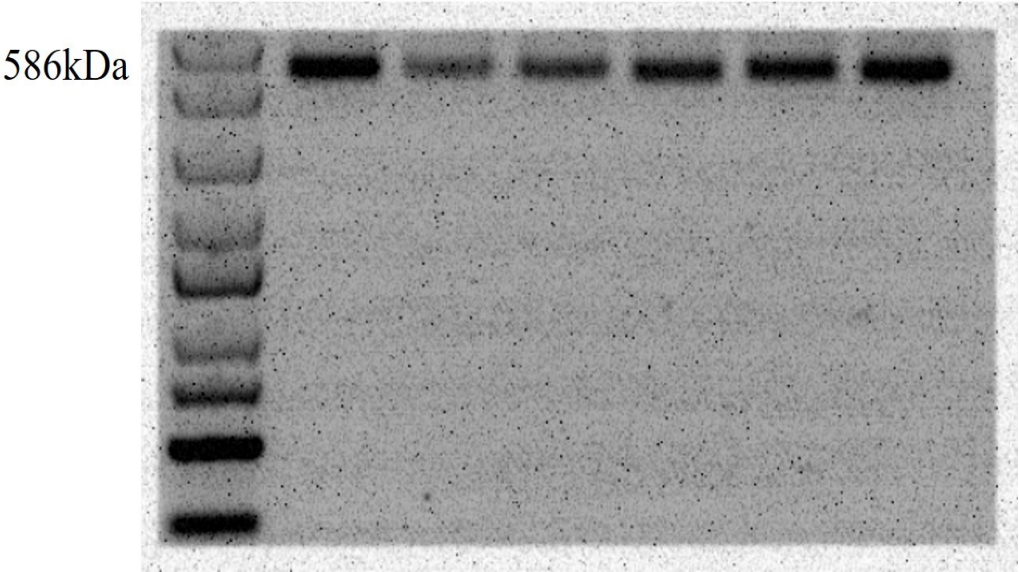

GAPDH

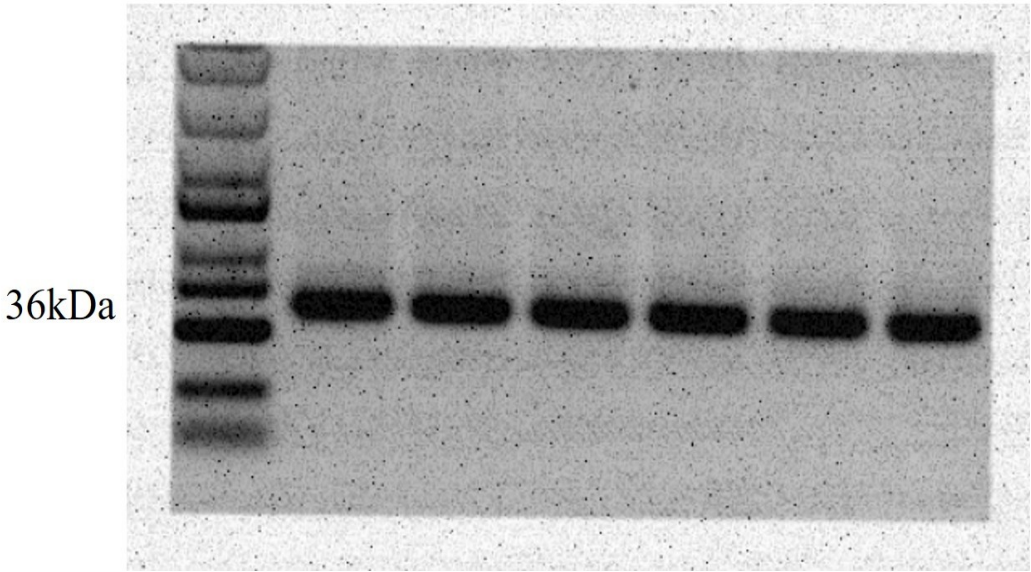

Supplement: d4fo01071j1.pdf [file d4fo01071j1.pdf]
